# Supplementary material
Source: Springer Nature journal article supplement (https://www.springermedizin.de/resource/supplementary/13058_2008_2220_MOESM5_ESM.pdf/9700920)

**Supplementary Figure 1D.** Expression of nuclear receptors and/or related genes decreasing during HC11 differentiation (upper panel) and correlating changes in *in vivo* mammary glands (lower panel), respectively. Average of three independent cell cultures and differentiations; or 3-5 mice in each stage, respectively. NR4a2 (NURR1), Nr4a1(NGFIB), Nr2f2 (COUP-TFII).

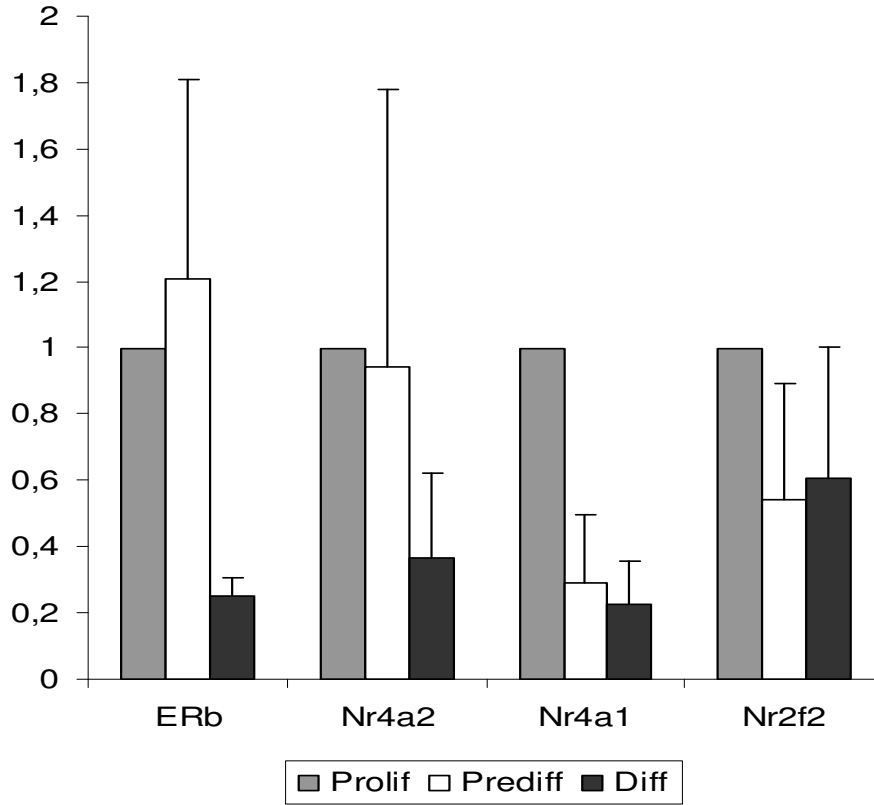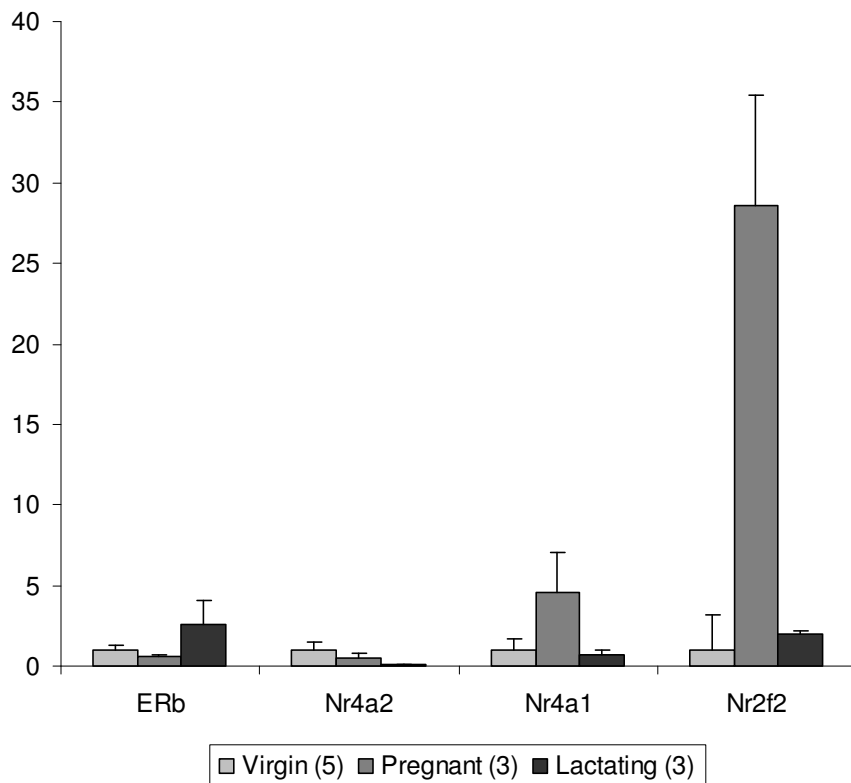

Supplement: MOESM5 [file 9700920]
